# Supplementary material for: Pb2+-introduced activation of horseradish peroxidase (HRP)-mimicking DNAzyme
Source: Royal Society of Chemistry journal article supplement (doi:10.1039/c1cc11349f), 2011-01-01
Supplement: c1cc11349f.pdf [file c1cc11349f.pdf]

## Supporting Information

1  
2  
3  
4  
5  
6  
7  
8  
9  
10  
11  
12  
13  
14  
15  
16  
17  
18  
19  
20  
21  
22

### Experimental details

#### Materials and chemicals

The DNA is synthesized by Sangon Inc. (Shanghai, China). Its sequence is shown below:

5'-CGCAGG(rA)TGTCGCCCGGGTAGGGCGGGTAGGGCGACAAGCTGGCCG  
AGCCTCTGCG-3'

Where *rA* is ribo-adenine. ABTS<sup>2-</sup> and hemin are bought from Aladdin Reagents (Shanghai, China). All other chemicals are of analytical grade. Metal ion solutions are prepared from nitrate salts.

All aqueous solutions are prepared by Milli-Q reagent water (Milli-Q, Millipore, 18.2-M $\Omega$  resistivity). DNA stock solution (the concentration of oligonucleotide is 10  $\mu$ mol/L) is prepared with 40 mmol/L Tris-acetate (TAE) (pH 7.4) containing 0.10 mol/L NaNO<sub>3</sub> and stored at 4  $^{\circ}$ C until being used. The hemin stock solution (10 mmol/L) is prepared in dimethylsulfoxide (DMSO) and stored in the dark at -20  $^{\circ}$ C. ABTS<sup>2-</sup> and H<sub>2</sub>O<sub>2</sub> working solutions are freshly prepared with 25 mmol/L TAE (pH 7.4) containing 150 mmol/L NaCl, 20 mmol/L KCl, 0.03% Triton X-100, and 1% DMSO before being used.

#### Assay of Pb<sup>2+</sup>

The colorimetric detection of Pb<sup>2+</sup> is performed at room temperature. The DNA solution from diluting the DNA stock solution has been heated at 80  $^{\circ}$ C for 10 min,

23 and then cooled to room temperature. Then different concentrations of  $\text{Pb}^{2+}$  were  
24 added into above solution. The final concentration of DNA in the mixture is 0.1  
25  $\mu\text{mol/L}$ . The mixture is incubated at room temperature for 16 h. Hemin and  $\text{ABTS}^{2-}$  is  
26 added into the solution with a final concentration of 0.1  $\mu\text{mol/L}$  and 3  $\text{mmol/L}$ ,  
27 respectively. The mixture is then held for 0.5 h. The peroxidase-mimicking reaction is  
28 initiated by the introduction of 3  $\text{mmol/L}$   $\text{H}_2\text{O}_2$  (final concentration). After these, the  
29 mixture is incubated until the solution has a stable color. Then the absorption  
30 spectradata is recorded with a UV-Vis spectrophotometer (Lamda 750 UV-Vis  
31 spectrophotometer, PE, USA) in the wavelength range from 500 to 410 nm.

32  
33

34 **Table S1** Determination of  $\text{Pb}^{2+}$  in water samples using the proposed method.

35 <sup>a</sup> Mean of three determinations. <sup>b</sup> SD, standard deviation.

|         | Added (nM) | Founded (nM)<br>Mean <sup>a</sup> $\pm$ SD <sup>b</sup> | Recovery (%) |
|---------|------------|---------------------------------------------------------|--------------|
| Sample1 | 100        | 91 $\pm$ 8                                              | 91           |
| Sample2 | 200        | 209 $\pm$ 10                                            | 104.5        |
| Sample3 | 300        | 295 $\pm$ 10                                            | 98.3         |

36  
37  
38  
39  
40  
41  
42
